# Supplementary material for: Sterol-Derived Hormone(s) Controls Entry into Diapause in Caenorhabditis elegans by Consecutive Activation of DAF-12 and DAF-16
Source: PubMed Central journal article supplement (PMC517820; doi:10.1371/journal.pbio.0020280), 2004-09-21

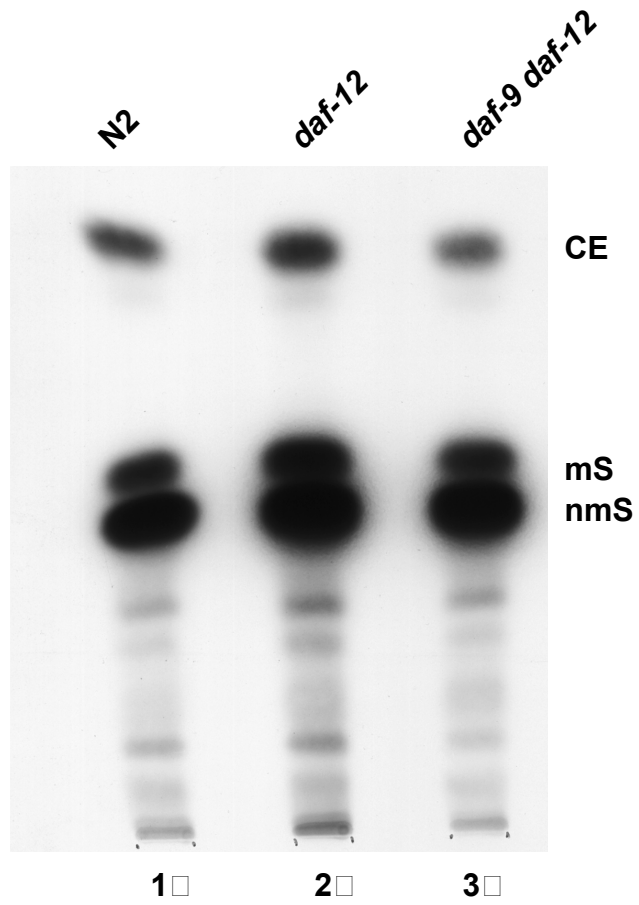

Supplement: pbio.0020280.sg001.pdf [file pbio.0020280.sg001.pdf]
